# Supplementary material
Source: PubMed Central journal article supplement (PMC10009874)
Supplement: NIHMS1824409-supplement-2.pdf [file NIHMS1824409-supplement-2.pdf]

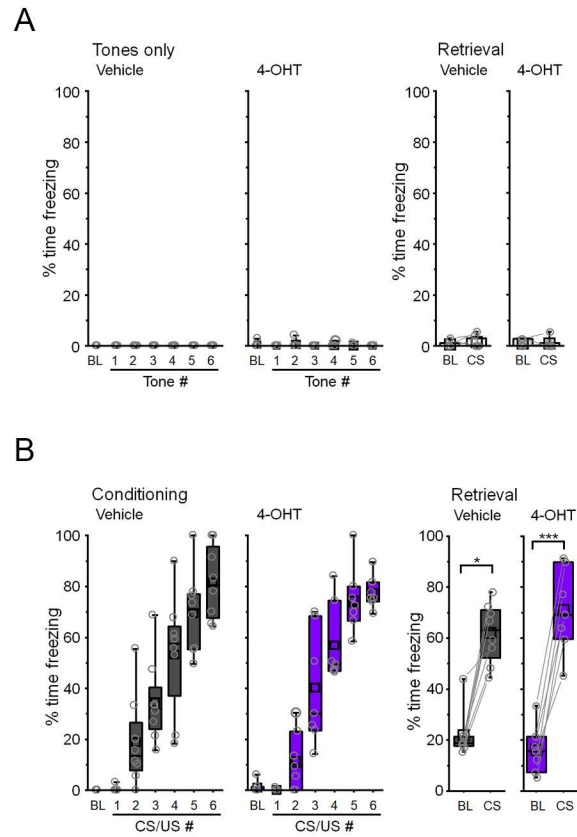

**Supplemental Figure 1 - related to Figure 1. Freezing during training and retrieval for mice in Fig 1. (A)** Freezing during conditioning and retrieval for mice exposed to tones only. Vehicle retrieval:  $W = 3$ ,  $p = 0.58$ , Wilcoxon signed rank test,  $n = 8$  mice. 4-OHT retrieval:  $W = 5$ ,  $p = 1$ , Wilcoxon signed ranked test,  $n = 7$  mice. **(B)** Freezing during CS-US pairing and CS-evoked retrieval for conditioned mice. Vehicle retrieval:  $W = 0$ ,  $p = 0.014$ , Wilcoxon signed rank test,  $n = 8$  mice. 4-OHT retrieval:  $t_6 = -11.4$ ,  $p = 2.68 \times 10^{-5}$ , paired t-test,  $n = 7$  mice. Experiment was performed in 3 different cohorts and pooled together. \*  $p < 0.05$ , \*\*\*  $p < 0.001$  by Wilcoxon signed rank (**B**: vehicle) and paired t-test (**B**: 4-OHT).

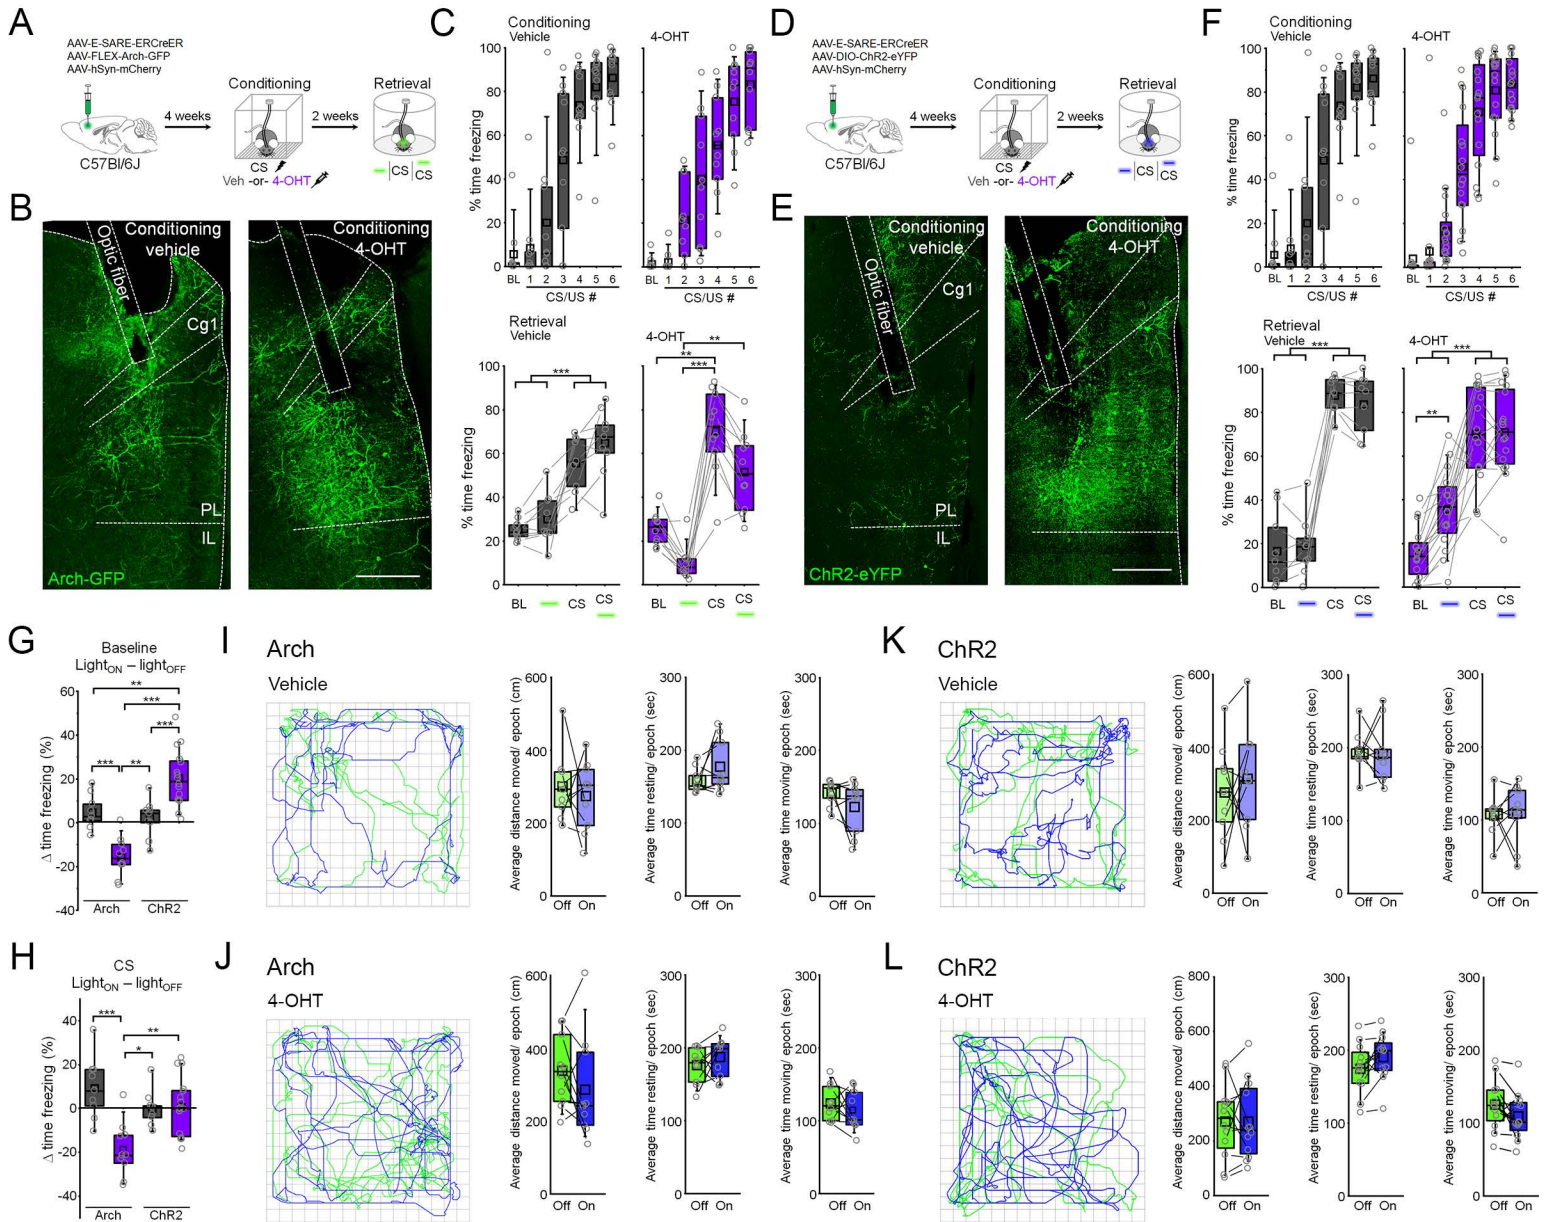

**Supplementary Figure 2 - related to Figure 1. Prefrontal neurons activated by fear learning mediate conditioned freezing. (A)** For *in vivo* optogenetic silencing of fear learning-related neurons, wildtype mice received bilateral infusions of a cocktail of vectors encoding E-SARE-ERCReER, Cre-dependent Arch, and hSyn-mCherry and were implanted with optic ferrules aimed at PL. Mice were subjected to CS-US pairing and immediately injected with vehicle (Veh) or 4-hydroxytamoxifen (4-OHT). Freezing was quantified two weeks later in a neutral context in response to independent and combined presentation of light and CS trials. **(B)** Representative histological images of Arch expression and optic fiber placement. Scale = 500  $\mu$ m. Cg1 = cingulate area 1. PL = prelimbic cortex. IL = infralimbic cortex. **(C)** Modulation of freezing by light (532 nm, constant, 20 s epochs) and CS trials in vehicle (gray) and 4-OHT (purple) injected mice. Vehicle:  $F_{(1,8)} = 408.43$ ,  $p = 3.75 \times 10^{-8}$ , 1-way repeated measures ANOVA,  $n = 9$  mice. 4-OHT:  $\chi^2 = 27.84$  (3),  $p = 3.92 \times 10^{-6}$ , Friedman ANOVA,  $n = 10$  mice. Experiments were performed in 3 different cohorts and pooled together. **(D)** For *in vivo* optogenetic activation of fear learning-related neurons, wildtype mice received bilateral infusions of a cocktail of vectors encoding E-SARE-ERCReER, Cre-dependent Chr2, and hSyn-mCherry and were implanted with optic ferrules aimed at PL. Behavior was conducted in a manner identical to **(A)**. **(E)** Representative histological images of Chr2 expression and optic fiber placement. Scale = 500  $\mu$ m. **(F)** Modulation of freezing by light (473 nm, 5 ms pulses, 20 Hz, 20 s epochs) and CS trials in vehicle (gray) and 4-OHT (purple) injected mice. Vehicle:  $F_{(1,8)} = 269$ ,  $p = 1.91 \times 10^{-7}$ , 1-way repeated measures ANOVA,  $n = 9$  mice. 4-OHT:  $F_{(1,15)} = 197$ ,  $p = 4.99 \times 10^{-10}$ , 1-way repeated measures ANOVA,  $n = 16$  mice. Experiments were performed in 4 different cohorts and pooled together. **(G)** Change in freezing induced by photostimulation during the baseline period in **(C)** and **(F)**. Effect of photostimulation (Light<sub>on</sub> - Light<sub>off</sub>):  $F_{(1,40)} = 37.2$ ,  $p = 3.56 \times 10^{-7}$ , interaction between opsin and light, 2-way ANOVA. **(H)** Change in freezing induced by photostimulation during CS trials in **(C)** and **(F)**. Effect of photostimulation (Light<sub>on</sub> - Light<sub>off</sub>):  $F_{(1,40)} = 14.4$ ,  $p = 4.8 \times 10^{-4}$ , interaction between opsin and light, 2-way ANOVA. **(I-J)** Locomotion was tested in wildtype mice from **(A)** in a 20-minute open field test during light-on and light-off periods (473 nm, 5 ms pulses, 20 Hz). Light on/off epochs were 5 minutes long and were presented in a counterbalanced fashion. Experiments were performed in 3 different cohorts and pooled together. **(I)** Example activity plot and quantification of locomotor parameters for vehicle mice ( $n = 9$  mice). Distance moved:  $t_8 = -0.587$ ,  $p = 0.57$ , paired t-test. Time resting:  $t_8 = 0.13$ ,  $p = 0.90$ , paired t-test. Time moving:  $t_8 = -0.129$ ,  $p = 0.90$ , paired t-test. **(J)** Example activity plot and quantification of locomotor parameters for 4-OHT mice ( $n = 10$  mice). Distance moved:  $t_{11} = 0.012$ ,  $p = 0.99$ , paired t-test. Time resting:  $t_{11} = -1.92$ ,  $p = 0.081$ , paired t-test. Time moving:  $t_{11} = 1.92$ ,  $p = 0.081$ , paired t-test. **(K-L)** Locomotion was tested in wildtype mice from **(D)** in a 20-minute open field test during light-on and light-off periods (532 nm, solid light). Light on/off epochs were 5 minutes long and were presented in a counterbalanced fashion. Experiments were performed in 4 different cohorts and pooled together. **(K)** Example activity plot and quantification of locomotor parameters for vehicle mice ( $n = 9$  mice). Distance moved:  $t_8 = 0.55$ ,  $p = 0.59$ , paired t-test. Time resting:  $W = 12$ ,  $p = 0.24$ , Wilcoxon signed rank test,  $n = 9$  mice. Time moving:  $W = 33$ ,  $p = 0.24$ , Wilcoxon signed rank test,  $n = 9$  mice. **(L)** Example activity plot and quantification of locomotor parameters for 4-OHT mice ( $n = 12$  mice). Distance moved:  $t_8 = 1.33$ ,  $p = 0.21$ , paired t-test. Time resting:  $t_8 = -0.956$ ,  $p = 0.36$ , paired t-test. Time moving:  $t_8 = 0.96$ ,  $p = 0.36$ , paired t-test. \*  $p < 0.05$ , \*\*  $p < 0.01$ , \*\*\*  $p < 0.001$ , Tukey's post-hoc test (**C**: vehicle, **F**, **G**, **H**) or Dunn's post-hoc test (**C**: 4-OHT).

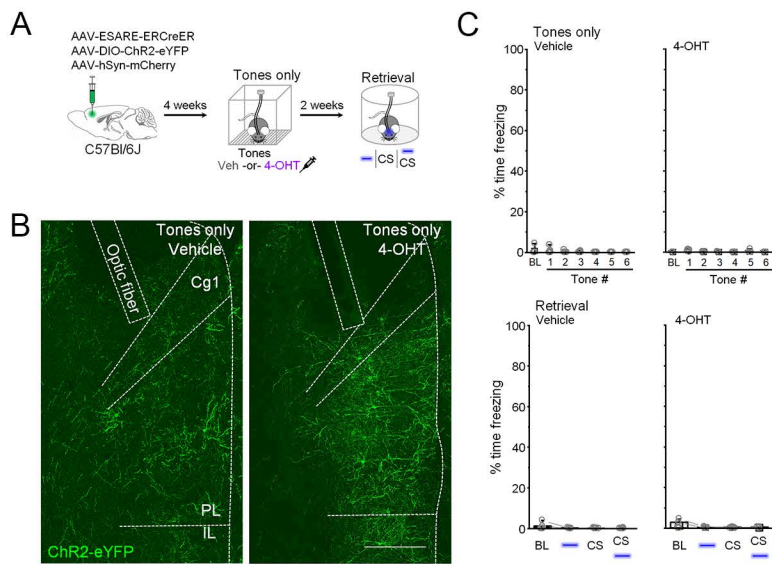

**Supplemental Figure 3 – related to Figure 1. No effect of photostimulation of neurons tagged during tones only training. (A)** For *in vivo* optogenetic activation of neurons tagged during tones only training, wildtype mice received bilateral infusions into prelimbic cortex of a cocktail of vectors encoding E-SARE-ERCreER, Cre-dependent ChR2, and hSyn-mCherry and were implanted with optic ferrules aimed at PL. Mice were presented with 6 auditory tones and immediately injected with vehicle (veh) or 4-hydroxytamoxifen (4-OHT). Freezing was quantified two weeks later in a neutral context while testing the independent and combined effect of light and tone presentation. **(B)** Representative histological images of ChR2 expression and optic fiber placement. Scale = 500  $\mu$ m. Cg1 = cingulate area 1, PL = prelimbic, IL = infralimbic. **(C)** Quantification of freezing during photoexcitation (473 nm, 5 ms pulses, 20 Hz, 20 s epochs) and CS presentation in vehicle (gray, n = 7 mice) and 4-OHT (purple, n = 6 mice) mice. Retrieval vehicle:  $\chi^2 = 0.214$  (3),  $p = 0.98$ , Friedman ANOVA. Retrieval 4-OHT:  $\chi^2 = 0.65$  (3),  $p = 0.88$ , Friedman ANOVA. Experiment was performed in 2 different cohorts and pooled together.



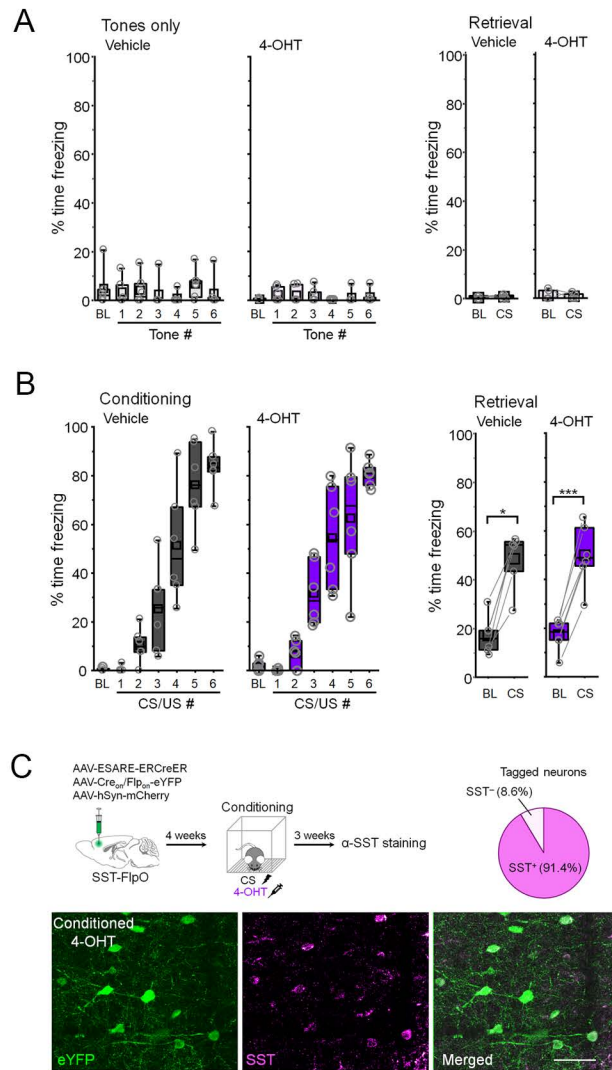

**Supplemental Figure 4 – related to Figure 2. Quantification of freezing during training and retrieval and confirmation of intersectional tagging for SST-FlpO mice in Fig 2. (A)** Freezing during tone presentation and retrieval for mice exposed to tones only. Vehicle retrieval:  $W = 3$ ,  $p = 0.36$ , Wilcoxon signed rank test,  $n = 6$  mice. 4-OHT retrieval:  $W = 4$ ,  $p = 0.79$ , Wilcoxon signed ranked test,  $n = 6$  mice. **(B)** Freezing during CS-US pairing and CS-evoked retrieval for conditioned mice. Vehicle retrieval:  $W = 0$ ,  $p = 0.036$ , Wilcoxon signed rank test,  $n = 6$  mice. 4-OHT retrieval:  $t_s = -9.95$ ,  $p = 1.75 \times 10^{-4}$ , paired t-test,  $n = 6$  mice. Experiment was performed in 4 different cohorts and pooled together. **(C)** For a random subset of 4-OHT-injected conditioned mice ( $n = 4$ ) from Fig. 2, tissue was stained against somatostatin (SST). The percent of tagged neurons positive for SST was quantified and reported as an average across all mice. Scale = 100  $\mu$ m. Experiment was performed in 2 different cohorts and pooled together. \*  $p < 0.05$ , \*\*\*  $p < 0.001$  by Wilcoxon signed rank (B: vehicle) and paired t-test (B: 4-OHT).

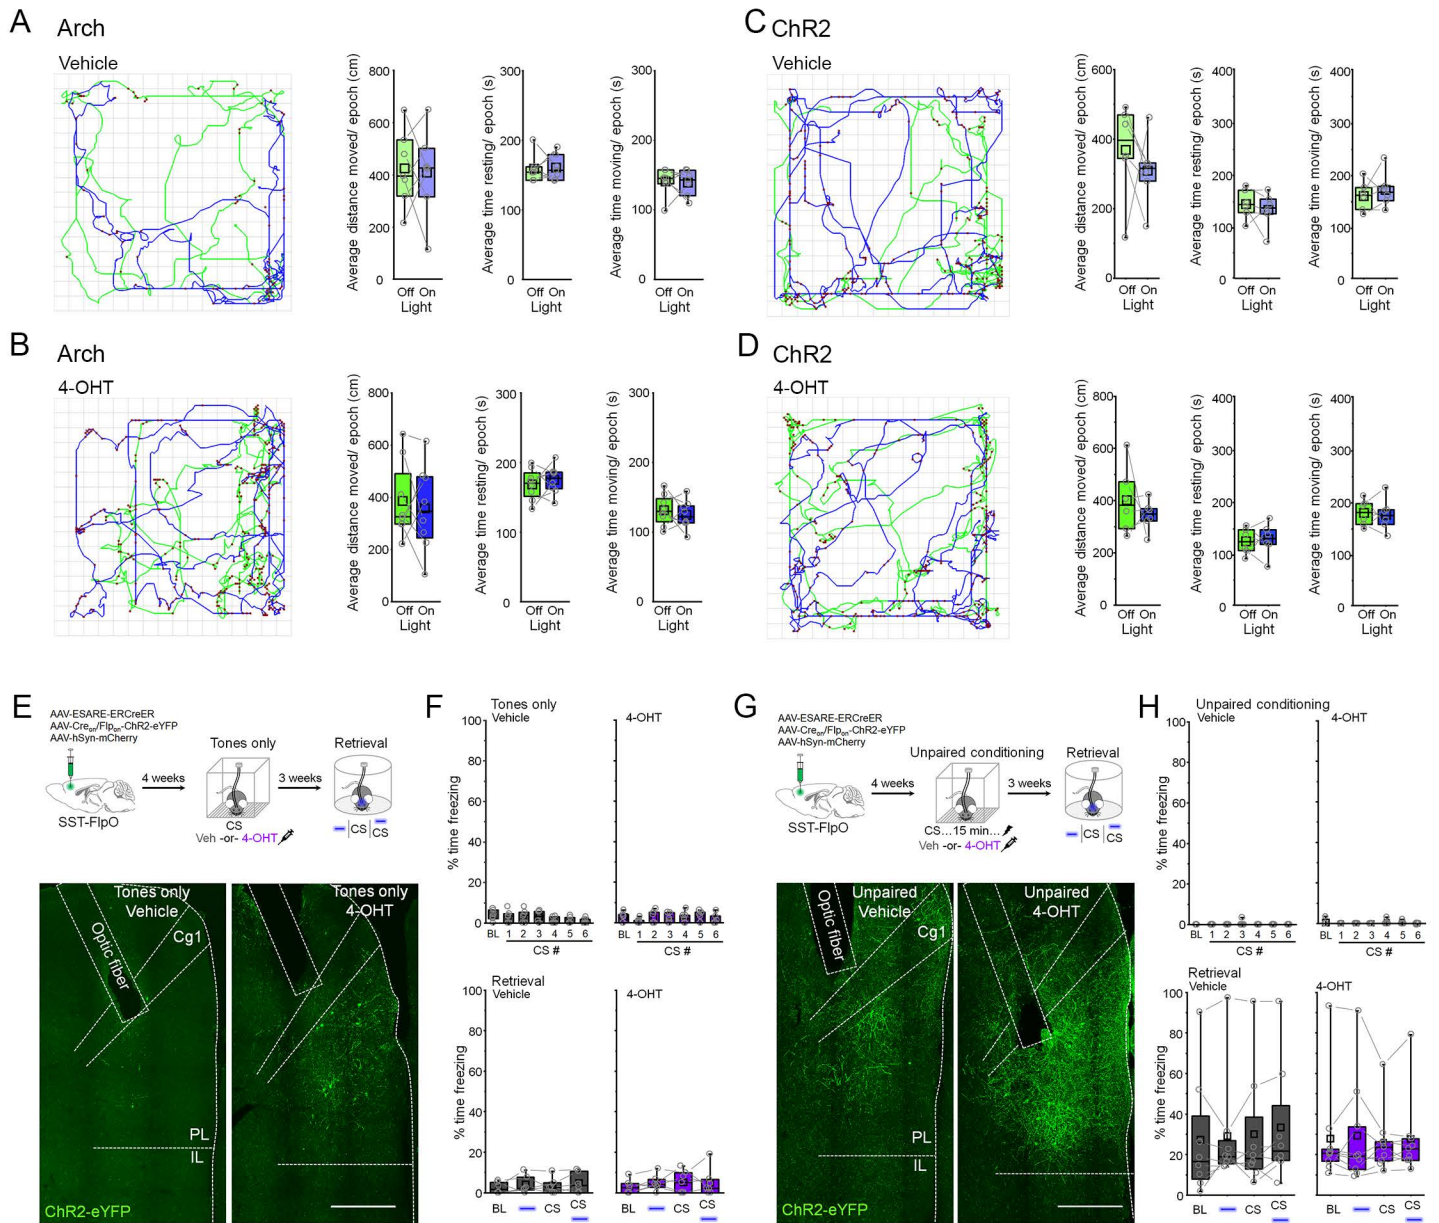

**Supplemental Figure 5 – related to Figure 3. Locomotor measures for mice in Fig.3 and no effect of photostimulation of SST-INS tagged during tones only or unpaired training. (A-D)** SST-FlpO transgenic mice received bilateral infusions into prelimbic cortex of a cocktail containing vectors encoding E-SARE-ERCreER, Cre- and Flp-dependent Arch, and hSyn-mCherry. Four weeks later, mice were subjected to CS-US pairing and then immediately injected with vehicle (veh) or 4-hydroxytamoxifen (4-OHT). **(A-B)** Three weeks after conditioning, locomotion was tested in a 20-minute open field test during light-on and light-off periods (532 nm, constant). Light on/off epochs were 5 minutes long and were presented in a counterbalanced fashion. Experiments were performed in 2 different cohorts and pooled together. **(A)** Example activity plot and quantification of locomotor parameters for vehicle mice (n = 7 mice). Distance moved:  $t_6 = 0.209$ ,  $p = 0.841$ , paired t-test. Time resting:  $W = 13$ ,  $p = 0.932$ , n = 7 mice, Wilcoxon signed rank test. Time moving:  $W = 15$ ,  $p = 0.932$ , n = 7 mice, Wilcoxon signed rank test. **(B)** Example activity plot and quantification of locomotor parameters for 4-OHT mice (n = 8 mice). Distance moved:  $t_7 = 0.472$ ,  $p = 0.65$ , paired t-test. Time resting:  $t_7 = -0.762$ ,  $p = 0.47$ , paired t-test. Time moving:  $t_7 = 0.763$ ,  $p = 0.47$ , paired t-test. **(C-D)** SST-FlpO transgenic mice received bilateral infusions into prelimbic cortex of a cocktail containing vectors encoding E-SARE-ERCreER, Cre- and Flp-dependent Chr2, and hSyn-mCherry. Four weeks later, mice were subjected to CS-US pairing and then immediately injected with vehicle (veh) or 4-hydroxytamoxifen (4-OHT). After three weeks, locomotion was tested in a 20-minute open field test during light-on and light-off periods (473 nm, 10 ms pulses, 20 Hz). Light on/off epochs were 5 minutes long and were presented in a counterbalanced fashion. **(C)** Example activity plot and quantification of locomotor parameters for vehicle mice (n = 6 mice). Distance moved:  $t_5 = 0.724$ ,  $p = 0.50$ , paired t-test. Time resting:  $t_5 = 0.795$ ,  $p = 0.46$ , paired t-test. Time moving:  $t_5 = -0.793$ ,  $p = 0.46$ , paired t-test. **(D)** Example activity plot and quantification of locomotor parameters for 4-OHT mice (n = 6 mice). Distance moved:  $t_5 = 0.822$ ,  $p = 0.45$ , paired t-test. Time resting:  $t_5 = -0.247$ ,  $p = 0.81$ , paired t-test. Time moving:  $t_5 = 0.247$ ,  $p = 0.81$ , paired t-test. Experiments were performed in 2 different cohorts and pooled together. **(E)** For *in vivo* optogenetic activation of SST-INS activated by tones only experience, SST-FlpO transgenic mice received bilateral infusions into prelimbic cortex of a cocktail of vectors encoding E-SARE-ERCreER, Cre- and Flp-dependent Chr2, and hSyn-mCherry and were implanted with optic ferrules aimed at PL. Mice were exposed to 6 auditory tones and immediately injected with vehicle (veh) or 4-hydroxytamoxifen (4-OHT). Freezing was quantified two weeks later in a neutral context while testing the independent and combined effect of light and tone presentation. Scale = 500  $\mu$ m. **(F)** Modulation of freezing by photoexcitation (473 nm, 5 ms pulses, 20 Hz, 20 s epochs) and tone presentation in vehicle (gray) and 4-OHT (purple) injected mice. Vehicle retrieval:  $F_{(3,15)} = 0.712$ ,  $p = 0.56$ , 1-way repeated measures ANOVA, n = 6 mice. 4-OHT retrieval:  $\chi^2 = 2.61$  (3),  $p = 0.46$ , Friedman ANOVA, n = 7 mice. Experiment was performed in 2 different cohorts and pooled together. **(G)** For *in vivo* optogenetic activation of SST-INS activated by unpaired conditioning, SST-FlpO transgenic mice underwent surgery as described in (E). After 4 weeks, mice underwent unpaired conditioning followed immediately by injections of vehicle (veh) or 4-hydroxytamoxifen (4-OHT). Freezing was quantified two weeks later in a neutral context while testing the independent and combined effect of light and CS presentation. Scale = 500  $\mu$ m. **(H)** Quantification of freezing during photoexcitation (473 nm, 5 ms pulses, 20 Hz, 20 s epochs) and CS presentation in vehicle (gray) and 4-OHT (purple) injected mice. Vehicle retrieval:  $\chi^2 = 1.99$  (3),  $p = 0.58$ , Friedman ANOVA, n = 8 mice. 4-OHT retrieval:  $\chi^2 = 1.4$  (3),  $p = 0.71$ , Friedman ANOVA, n = 9 mice. Experiment was performed in 3 different cohorts and pooled together.



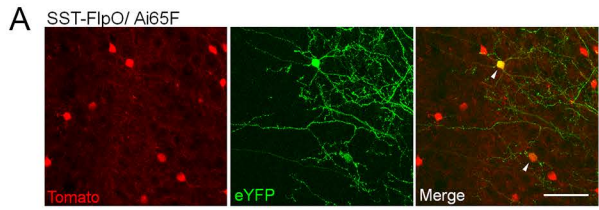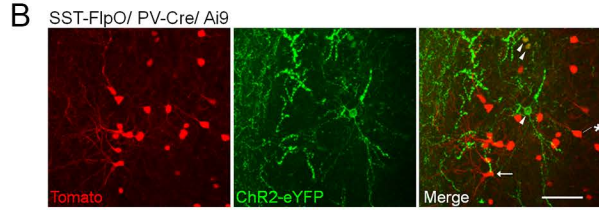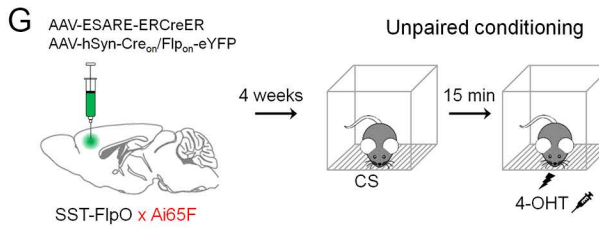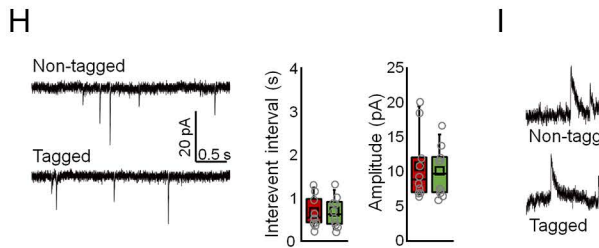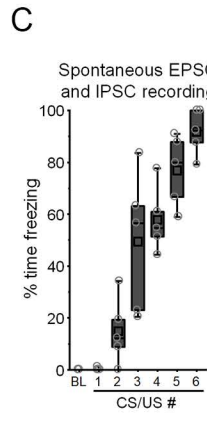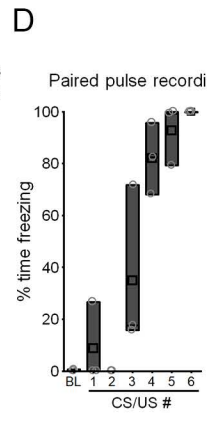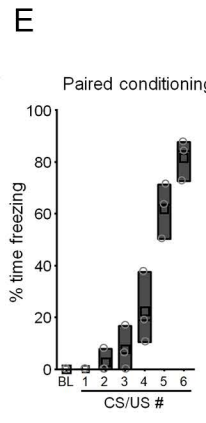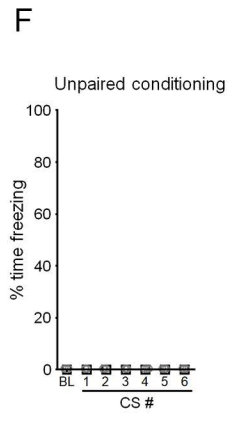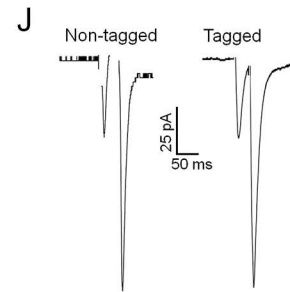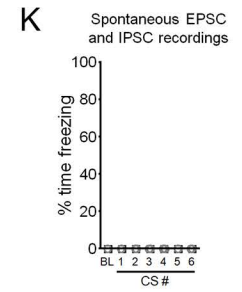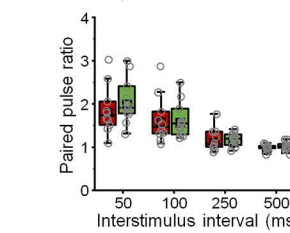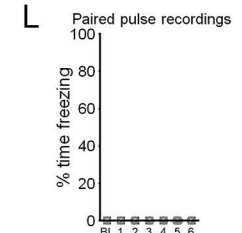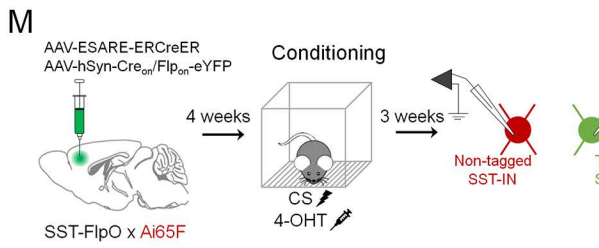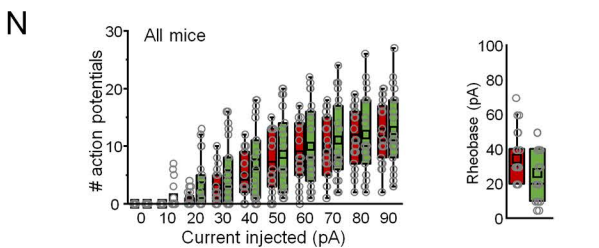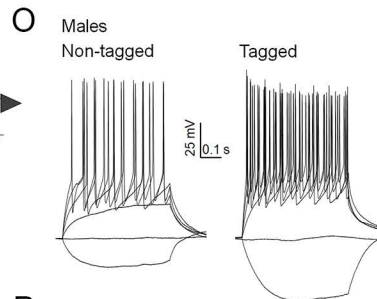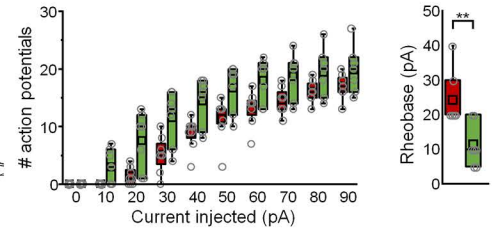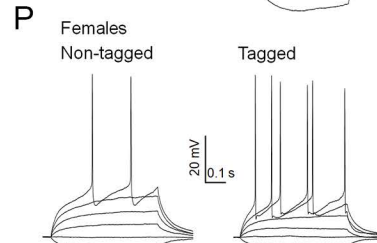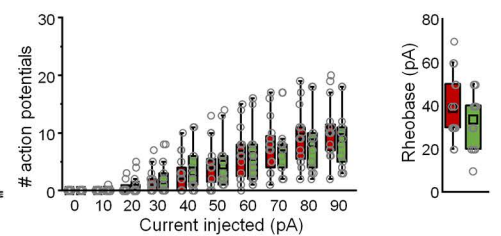

**Supplemental Figure 6 – related to Figure 4. Additional freezing measures and electrophysiological analysis of tagged versus nontagged neurons after unpaired or paired fear conditioning. (A)** Discrimination of tagged (eYFP+, tdTomato+) from non-tagged (tdTomato+) SST-INs following intersectional labeling as described in Fig. 4A. Scale = 100  $\mu$ m. **(B)** Discrimination of tagged SST-INs (Chr2-eYFP+; arrow heads), PV-INs (tdTomato+; putative PV-IN denoted with arrow) and tagged PNs (tdTomato+; putative tagged PN denoted with asterisk) following intersectional labeling as described in Fig. 4E. **(C)** Freezing during CS/US pairings for mice used for spontaneous EPSC and IPSC recordings in Fig. 4. **(D)** Freezing during CS/US pairings for mice used for paired pulse recordings in Fig. 4. **(E)** Freezing during CS/US pairings for mice used to record light-elicited responses from tagged SST-INs onto neighboring PV-INs, tagged PNs, and non-tagged PNs in Fig. 4. **(F)** Freezing during CS presentations (training in unpaired mice) for mice used to record light-elicited responses from tagged SST-INs onto neighboring PV-INs, tagged PNs, and non-tagged PNs in Fig. 4. **(G-L)** No differences in synaptic properties between tagged and nontagged SST-INs following unpaired conditioning. **(G)** SST-FlpO/ Ai65F double transgenic mice received prelimbic infusions of a cocktail of vectors encoding E-SARE-ERCreER, as well as Cre- and Flp-dependent eYFP. Mice were subjected to unpaired conditioning and immediately injected with 4-hydroxytamoxifen (4-OHT). Three weeks later, recordings were obtained from eYFP+/ tdTomato+ (tagged) and eYFP-/ tdTomato+ (non-tagged) SST-INs. **(H)** Spontaneous excitatory postsynaptic currents (EPSCs) were recorded from tagged (n = 10 cells) and non-tagged SST-INs (n = 10 cells) in the same slices (n = 4 slices from 4 mice). Interevent interval:  $t_{18} = -0.062$ ,  $p = 0.95$ , two-sided unpaired t-test. Amplitude:  $U = 51$ ,  $p = 0.97$ , Mann-Whitney U-test. **(I)** Spontaneous inhibitory postsynaptic currents (IPSCs) were recorded from tagged (n = 10 cells) and non-tagged SST-INs (n = 10 cells) in the same slices (n = 4 slices from 4 mice). Interevent interval:  $t_{18} = -0.269$ ,  $p = 0.79$ , two-sided unpaired t-test. Amplitude:  $t_{18} = -0.243$ ,  $p = 0.81$ , two-sided unpaired t-test. **(J)** EPSC recordings from non-tagged (n = 10 cells) and tagged SST-INs (n = 11 cells) in the same slices (n = 3 slices in 3 mice) during paired pulse stimulation. Paired pulse ratio:  $F_{(3,27)} = 0.545$ ,  $p = 0.66$ , 2-way repeated measures ANOVA. **(K)** Freezing during CS presentation (training) for unpaired mice used for spontaneous EPSC and IPSC recordings. **(L)** Freezing during CS presentation (training) for unpaired mice used for paired pulse recordings. Experiment was performed in mice from 2 different litters and pooled together. **(M-O)** Higher excitability of tagged relative to nontagged SST-INs in male mice following paired conditioning. **(M)** SST-FlpO/ Ai65F double transgenic mice received prelimbic infusions of a cocktail of vectors encoding E-SARE-ERCreER, as well as Cre- and Flp-dependent eYFP. Mice were subjected to CS-US pairing and were immediately injected with 4-hydroxytamoxifen (4-OHT). Three weeks later, recordings were obtained from eYFP+/ tdTomato+ (tagged) and eYFP-/ tdTomato+ (non-tagged) SST-INs. **(N)** Input-output curves and rheobase quantification for tagged (n = 21 cells) and non-tagged (n = 23 cells) SST-INs in the same slices of male and female mice (n = 6 slices from 6 mice). Input-output:  $F_{(9,180)} = 1.79$ ,  $p = 0.072$ , 2-way repeated measures ANOVA. Rheobase:  $U = 306.5$ ,  $p = 0.12$ , Mann-Whitney U-test. **(O)** Representative spike trains (-20 pA and +10-40 pA current injections), input-output curves, and rheobase quantification for tagged (n = 7 cells) and non-tagged (n = 7 cells) SST-INs in the same slices of male mice (n = 3 slices from 3 mice). Input-output:  $F_{(9,36)} = 1.81$ ,  $p = 0.10$ , 2-way repeated measures ANOVA. Rheobase:  $U = 44$ ,  $p = 0.0090$ , Mann-Whitney U-test. **(P)** Representative spike trains (-20 pA and +10-40 pA current injections), input-output curves, and rheobase quantification for tagged (n = 14 cells) and non-tagged (n = 16 cells) SST-INs in the same slices of female mice (n = 3 slices from 3 mice). Input-output:  $F_{(9,99)} = 0.522$ ,  $p = 0.86$ , 2-way repeated measures ANOVA. Rheobase:  $U = 126$ ,  $p = 0.56$ , Mann-Whitney U-test. \*\*  $p < 0.01$  by Mann-Whitney U-test (O: rheobase). Experiments were performed in mice from 2 different litters and pooled together.

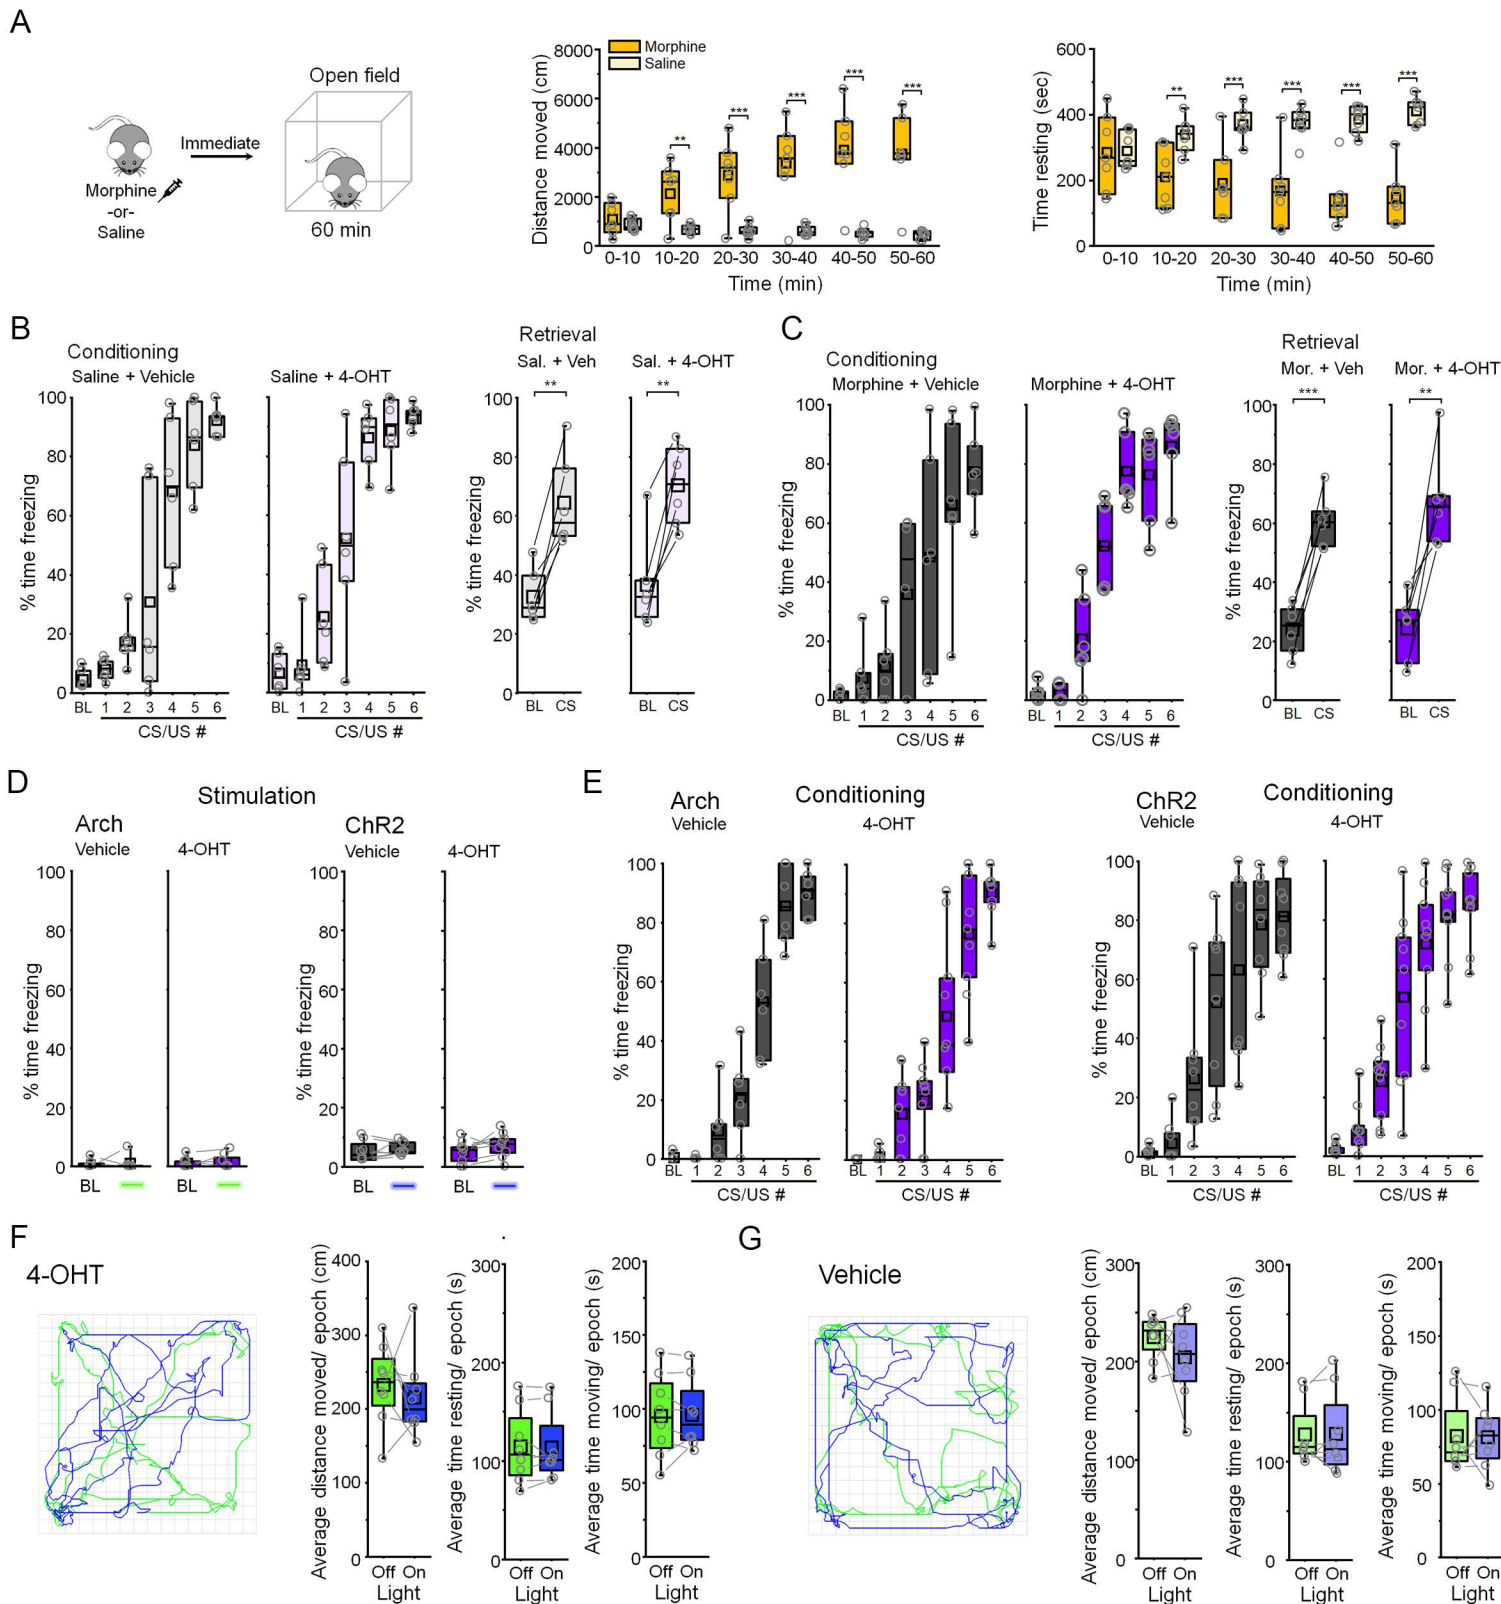



**Supplemental Figure 7 – related to Figure 5. Additional locomotor and freezing measures for mice that received both morphine and fear conditioning.** (A) To obtain a behavioral readout of acute morphine effects, wildtype mice received IP injections of 10 mg/kg morphine in saline or saline alone and were immediately submitted to an open field test for 60 minutes. Quantification of locomotor parameters was conducted for morphine (n = 7 mice) and saline mice (n = 7 mice) in the open field immediately after morphine or saline injections. Distance moved:  $F_{(5,30)} = 28.3$ ,  $p = 1.68 \times 10^{-10}$ , interaction between drug group and time, 2-way repeated measures ANOVA. Time resting:  $F_{(5,30)} = 19.4$ ,  $p = 1.35 \times 10^{-8}$ , interaction between drug group and time, 2-way repeated measures ANOVA. Experiment was performed in 1 cohort of mice. \*\*,  $p < 0.01$ ; \*\*\*,  $p < 0.001$  by Tukey's post-hoc test. (B-C) Freezing during conditioning and retrieval for mice in Fig. 5B-F. (B) Freezing during conditioning and memory retrieval for mice injected with saline. Saline vehicle retrieval:  $t_5 = -5.94$ ,  $p = 0.002$ , paired t-test, n = 6 mice. Saline 4-OHT retrieval:  $t_5 = -5.94$ ,  $p = 0.002$ , paired t-test, n = 6 mice. (C) Freezing during conditioning and memory retrieval for mice injected with morphine. Morphine vehicle retrieval:  $t_5 = -9.35$ ,  $p = 2.36 \times 10^{-4}$ , paired t-test, n = 6 mice. Morphine 4-OHT retrieval:  $t_5 = -5.4$ ,  $p = 0.003$ , paired t-test, n = 6 mice. Experiment was performed in 2 different cohorts and pooled together. (D-E) Freezing during pre-training photostimulation test and during fear conditioning for mice in Fig. 5G-I. (D) Freezing during the pre-training photostimulation test. Arch vehicle:  $W = 5$ ,  $p = 1$ , Wilcoxon signed rank test. Arch 4-OHT:  $W = 3$ ,  $p = 0.62$ , Wilcoxon signed rank test. ChR2 vehicle:  $t_7 = -0.788$ ,  $p = 0.46$ , paired t-test. ChR2 4-OHT:  $t_8 = -1.74$ ,  $p = 0.12$ , paired t-test (E) Freezing during fear conditioning for morphine-treated mice. (F-G) Photostimulation of morphine-activated SST-INs does not affect general locomotion. SST-FlpO transgenic mice received bilateral prelimbic infusions of a cocktail containing vectors encoding E-SARE-ERCreER, Cre- and Flp-dependent ChR2, and hSyn-mCherry. Four weeks later, mice were injected with morphine (10 mg/kg) followed 10 hours later by injections of vehicle (veh) or 4-hydroxytamoxifen (4-OHT). After three weeks, locomotion was tested in a 20-minute open field test during light-on and light-off periods (473 nm, 10 ms pulses, 20 Hz). Light on/off epochs were 5 minutes long and were presented in a counterbalanced fashion. (F) Example activity plot and quantification of locomotor parameters for vehicle mice (n = 8 mice). Distance moved:  $t_7 = 1.14$ ,  $p = 0.29$ , paired t-test. Time resting:  $W = 18$ ,  $p = 1$ , Wilcoxon signed rank test. Time moving:  $W = 18$ ,  $p = 1$ , Wilcoxon signed rank test. (G) Example activity plot and quantification of locomotor parameters for 4-OHT mice (n = 8 mice). Distance moved:  $t_7 = 0.639$ ,  $p = 0.54$ , paired t-test. Time resting:  $W = 16$ ,  $p = 0.83$ , Wilcoxon signed rank test. Time moving:  $t_7 = -0.159$ ,  $p = 0.88$ , paired t-test. Experiments were performed in 2 different cohorts and pooled together. \*\*,  $p < 0.01$ , \*\*\*,  $p < 0.001$  by Tukey's post-hoc (A) or paired t-test (B-C).

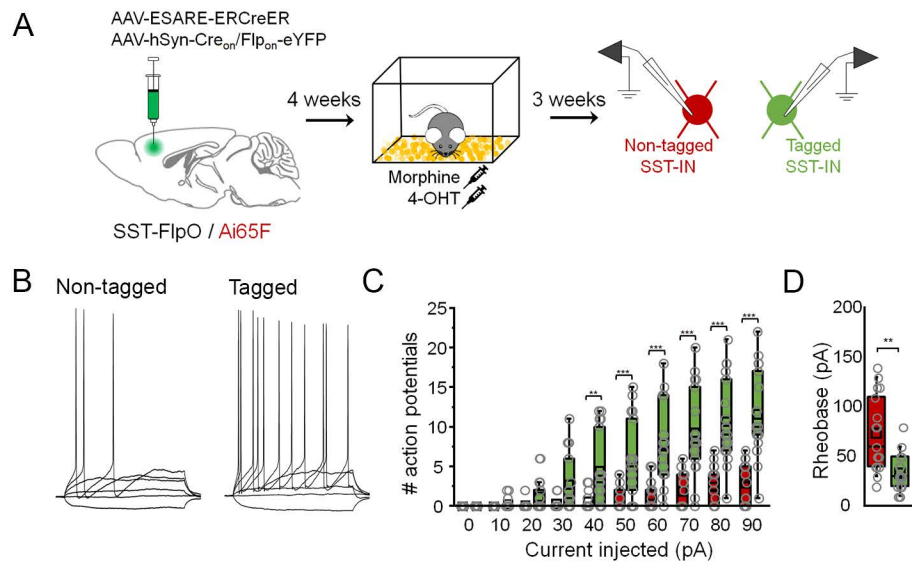

**Supplemental Figure 8 – related to Figure 8. Comparison of intrinsic excitability between tagged and non-tagged SST-INs after morphine administration.** (A) SST-FlpO/ Ai65F double transgenic mice received prelimbic infusions of a cocktail of vectors encoding E-SARE-ERCreER, as well as Cre- and Flp-dependent eYFP. Mice were subjected to IP injections of 10 mg/kg morphine and were injected with 4-hydroxytamoxifen (4-OHT) 10 hours later. Three weeks later, recordings were obtained from eYFP+/ tdTomato+ (tagged) and eYFP-/ tdTomato+ (non-tagged) SST-INs. (B) Representative spike trains (-20 pA and +10-40 pA current injections), input-output curves, and rheobase quantification for tagged (n = 19 cells) and non-tagged (n = 17 cells) SST-INs in the same slices of male and female mice (n = 6 slices from 6 mice). (C) Input-output:  $F_{(9,144)} = 36.3$ ,  $p = 7.72 \times 10^{-33}$ , interaction between cell type and current injected, 2-way repeated measures ANOVA. (D) Rheobase:  $U = 268$ ,  $p = 6.71 \times 10^{-4}$ , Mann-Whitney U-test. \*\*  $p < 0.01$ , \*\*\*  $p < 0.001$  by Tukey's post-hoc test in (C) or Mann-Whitney U-test in (D). Experiments were performed in mice from 2 different cohorts and pooled together.
